1 **Noradrenergic alpha-2A receptor activation suppresses courtship vocalization in male**  
2 **Japanese quail.**

3

4 Yasuko Tobari<sup>a,b</sup>, Ami Masuzawa<sup>a</sup>, Norika Harada<sup>a</sup>, Kenta Suzuki<sup>c</sup>, Simone L. Meddle<sup>d</sup>

5 <sup>a</sup>Department of Animal Science and Biotechnology, School of Veterinary Medicine, Azabu University,  
6 Fuchinobe 1-17-71, Chuo-ku, Sagamihara, Kanagawa 252-5201, Japan

7 <sup>b</sup>Center for Human and Animal Symbiosis Science, Azabu University, Fuchinobe 1-17-71, Chuo-ku,  
8 Sagamihara, Kanagawa 252-5201, Japan

9 <sup>c</sup>Faculty of Health Sciences, Nihon Institute of Medical Science, Iruma-gun, 350-0435, Japan

10 <sup>d</sup>The Roslin Institute and R(D)SVS, The University of Edinburgh, Easter Bush, Midlothian, EH25 9RG, UK

11

12

13 \* Correspondence to: Y. Tobari, Department of Animal Science and Biotechnology, School of Veterinary  
14 Medicine, Azabu University, Fuchinobe 1-17-71, Chuo-ku, Sagamihara, Kanagawa 252-5201, Japan

15 E-mail: [tobari@azabu-u.ac.jp](mailto:tobari@azabu-u.ac.jp)

16

17 Declarations of interest: none

18

19 **ABSTRACT**

20

21 Male Japanese quail produce high-frequency crow vocalizations to attract females during the breeding  
22 season. The nucleus of intercollicularis (ICo) is the midbrain vocal center in birds and electrical stimulation  
23 of the ICo produces calls that include crowing. Noradrenaline plays a significant role in sexual behavior but  
24 the contribution of noradrenaline in the control of courtship vocalizations in quail has not been well  
25 established. Using dose-dependent intracerebroventricular injection of clonidine, an  $\alpha$ 2-adrenergic receptor-  
26 specific agonist, crowing vocalization was immediately suppressed. At the same time as crow suppression by  
27 clonidine there was a reduction of immediate early gene, zenk mRNA, in the ICo; no zenk mRNA expression  
28 was detected in the dorsomedial division of the nucleus. Using histochemistry, we determined that the ICo  
29 receives noradrenergic innervation and expresses  $\alpha$ 2A-adrenergic receptor mRNA. Taken together, these data  
30 suggest that noradrenaline regulates courtship vocalization in quail, possibly via the alpha2A-  
31 adrenergic receptor expressed on ICo neurons.

32

33

34 Keywords;  $\alpha$ 2-adrenergic receptor, Bird, Courtship vocalization, Food intake, Immediate early gene,  
35 Norepinephrine, Nucleus intercollicularis

36

37

## 38 **1. Introduction**

39 Vocal behavior is commonly used by vertebrates for intraspecific communication. Vocalizations are emitted  
40 according to the behavioral context, and under some circumstances, vocalization abruptly stops in response to  
41 a change in situation. Crowing vocalization is one of the most characteristic courtship behaviors exhibited by  
42 male Japanese quail (*Coturnix japonica*), and data from the field suggest that males crow primarily in the  
43 absence of females [1]. In captivity, crowing, which can reach 95 dB, consists of two to three syllables [2]  
44 and is performed by sexually mature, individually housed males that are at least 32 days old [3]. Playback  
45 experiments have shown that females, but not males, exhibit positive phonotaxis to crowing [2]. Crowing  
46 behavior is context dependent as when males are in the presence of a female, they instantly stop crowing and  
47 actively approach her for copulation [4-7] suggesting that crowing functions to attract females. The presence  
48 of a female tends to be sufficient to suppress male crowing in Japanese quail, but to date the neurochemical  
49 pathway involved in the suppression of crowing in the brain has not been identified.

50 The mesencephalic nucleus intercollicularis (ICo) is a crucial component of the vocal control system  
51 in birds including Galliforme species [8]. Electrical stimulation of the ICo alone produces a type of calling  
52 with some characteristic acoustic features of crowing [9-11]. Perturbation of the neural activity of the ICo  
53 results in disruption of ongoing crowing behavior in sexually mature male quail [12] and vocal activity is  
54 reduced or even eliminated following bilateral lesions of the ICo in the quail [13] and ring dove (*Streptopelia*  
55 *risoria*, [14]. Receptor binding experiments in quail show that there is a high density of  $\alpha 2$ -adrenergic  
56 receptors in the ICo [15, 16], but a low concentration of  $\alpha 1$ -adrenergic receptors [17]. Noradrenaline binds to  
57 the  $\alpha 2$ -adrenergic receptor, which is primarily postsynaptic in the ICo of quail [18]. The existence of sexual  
58 dimorphism in the  $\alpha 2$ -adrenergic receptor density in the quail ICo suggests that noradrenaline is a possible  
59 neurochemical factor underlying the sexually dimorphic vocal behavior. The effect of noradrenaline on call  
60 vocalizations has previously been investigated in the ring dove and chicken (*Gallus gallus*) where  
61 pharmacological treatments point to an inhibitory action of noradrenaline on calling behavior [19, 20].

62 In the current study, we tested the hypothesis that brain noradrenaline acts through  $\alpha 2$ -adrenergic  
63 receptors in the ICo to attenuate crowing in adult male quail in breeding condition. Male quail were injected  
64 centrally with noradrenaline, clonidine ( $\alpha 2$ -adrenergic receptor agonist), or vehicle, and the number of  
65 crowing vocalizations in a 1 h period immediately following the injections was quantified. We also tested  
66 the hypothesis that crowing suppression is an active inhibitory process within the ICo by quantifying  
67 immediate early gene (IEG) expression, which is used as a marker of neuronal activation [21]. The  
68 expression of zenk (an acronym of *zif-268*, *egr-1*, *ngf1-a*, and *krox-24*) IEG mRNA in the ICo of male quail  
69 centrally injected with clonidine or vehicle was quantified. Finally, to test the hypothesis that noradrenaline  
70 directly controls ICo neurons, noradrenergic innervation and expression of the  $\alpha 2$ -adrenergic receptor  
71 mRNA in the ICo of male quail was examined.

72

## 73 **2. Materials and methods**

### 74 **2.1. Animals**

75 Twenty-seven male Japanese quail (*Coturnix japonica*) were obtained from the breeding colony at Azabu  
76 University. The ages were over 63 days post hatching. All birds were sexually mature, as demonstrated by  
77 an enlarged cloacal gland and weighed from 90 to 150 g. They were maintained on a long-day photoperiod  
78 (16L:8D light/dark cycle; lights on 06:00) and provided with food and water *ad libitum*. They were housed in  
79 one room in individual wire cages (30 × 40 × 24 cm. Each bird was given a colored leg band for  
80 identification and randomly assigned to experimental groups. All birds had visual and auditory contact with  
81 other birds of the same sex. All experiments were approved by the Ethics Committee for the Use of Animals  
82 of Azabu University, Japan and follow ARRIVE guidelines (<https://arriveguidelines.org/arrive-guidelines>).

83

### 84 **2.2. Stereotaxic surgery**

85 Birds were anesthetized with an intramuscular injection of a ketamine (12.5 mg/kg body weight) and  
86 xylazine (25 mg/kg) mixture, and once sedated, placed in a stereotaxic apparatus (Narishige, Tokyo, Japan).  
87 Intracerebroventricular (ICV) cannulation was performed according to a stereotaxic atlas of the Japanese  
88 quail brain [22]. A stainless steel cannula guide sleeve (11 mm, 26 gauge; Plastics One, Akron, OH, USA)  
89 was inserted into the third ventricle (3.0 mm anterior, 0 mm lateral from the Y-point, and 7.0 mm deep from  
90 the surface of the dura mater). The cannula was anchored to the skull with resin cement  
91 (RelyX Unicem 2 Clicker; 3M ESPE, St. Paul, MN, USA). The cannula was kept closed at all times by a  
92 dummy wire affixed to a threaded cap. Correct placement of the cannula was confirmed 1 day after surgery  
93 by infusing 1 µg of human angiotensin-II (Calbiochem, San Diego, CA, USA) dissolved in 0.9% NaCl. This  
94 peptide rapidly stimulates drinking behavior in birds when infused into the third ventricle [23]. Only birds  
95 that immediately responded to the angiotensin-II infusion by increasing their water intake were used in the  
96 experiment.

97

### 98 **2.3 Infusion and behavioral analysis**

99 Using a within-subjects design, the effects of noradrenaline and clonidine on crow vocalizations were  
100 quantified in 18 Japanese quail, with 1 day between the tests. As the frequency of voluntary crowing during  
101 isolation differed among the birds (Fig. 1) the differences in the number of crows emitted by the same  
102 individual between days 1 and 2 of the behavioral experiment were examined, to determine the effects of the  
103 drugs on crow vocalizations. Birds were randomly assigned to one of six groups that received a central  
104 injection of 0.9% NaCl (vehicle), 1 or 10 µg of noradrenaline (norepinephrine bitartrate salt; Sigma-Aldrich,  
105 St. Louis, MO, USA), or 100 ng, 500 ng or 1 µg of clonidine (clonidine hydrochloride, Sigma-Aldrich)

106 dissolved in vehicle. The birds were kept in an experimental cage (45 × 45 × 44.5 cm) in a soundproof box  
107 (MC-050T; Muromachi Kikai Co., Ltd., Tokyo, Japan) under 16L:8D (lights on 06:00) for at least 6 days  
108 before the start of the behavioral experiment. Food and water were provided to all birds *ad libitum* during the  
109 acclimation period and 60-min test periods. On day 1 of the experiment, the birds received infusions of the  
110 vehicle alone. The birds were gently held while a dummy wire was removed and the injector cannula, with  
111 the end of the tubing opposite to a Hamilton microsyringe, was inserted into the guide sleeve. Each bird was  
112 then returned to its experimental cage 1 min after the injection, and quail behavior was recorded by a  
113 Logicoool HD Pro C920 webcam connected to a Windows PC via USB in addition to a Roland R-  
114 26 portable recorder (Roland Corporation; 26-bits, sampling frequency: 44.1 kHz) during a 60-min period.  
115 On day 2 the birds received infusions of 1 µg of noradrenaline (n = 3), 10 µg of noradrenaline (n = 4), or 100  
116 ng (n = 2), 500 ng (n = 2), or 1 µg of clonidine (n = 3) dissolved in vehicle or vehicle alone (n = 4) at the  
117 same time each bird received infusion of vehicle on day 1. After the injection, each bird was returned to its  
118 experimental cage. All solutions were injected over 10–20 s in a volume of 2 µl. All behavioral recordings  
119 were conducted between 09:00 and 12:00 to avoid any variability caused by diurnal rhythms in vocal  
120 behavior. The number of crow vocalizations was counted and the duration of food pecking was quantified.  
121 Three birds were selected from each of the vehicle and 1 µg clonidine groups for *in situ* hybridization and  
122 histological analyses based on their behavioral performance.

123

#### 124 **2.4. Immunohistochemistry**

125 Three adult male quail in breeding condition were deeply anesthetized with mixed intramuscular injection of  
126 a ketamine (12.5 mg/kg body weight) and xylazine (25 mg/kg), and transcardially perfused with 0.01 M  
127 phosphate-buffered saline (PBS) followed by 4% paraformaldehyde. Brains were immediately dissected out  
128 of the skull and post-fixed in 4% paraformaldehyde in 0.1 M phosphate buffer, pH 7.4 for 1 day at 4°C and  
129 then transferred into 30% sucrose in 0.1 M phosphate buffer, pH 7.4 solution and kept for 3 days at 4°C.  
130 Brains were then embedded in Tissue-Tek optimal cutting temperature compound (Sakura Finetek, Tokyo,  
131 Japan), frozen on powdered dry ice and stored at –80°C until sectioning. Each brain was then sectioned in  
132 the frontal plane at 50 µm on a cryostat (Leica Microsystems, Wetzlar, Germany), and every sixth section  
133 through the brainstem from each animal was collected into 0.1M PBS. Free-floating sections were rinsed for  
134 5 min in PBS and then incubated for 15 min in PBS containing 0.6% hydrogen peroxide to inhibit  
135 endogenous peroxide activity. Next, the sections were rinsed three times for 5 min with 0.3% Triton X-100  
136 in PBS (PBST) and blocked with 5% normal sheep serum in PBST for 2 h at room temperature (RT). The  
137 sections were then incubated overnight with rabbit polyclonal antiserum against dopamine-beta-hydroxylase  
138 (DBH) purified from the bovine adrenal medulla (Product ID: 22806; ImmunoStar, Hudson, WI, USA) at a  
139 dilution of 1:2,000 in PBST and 4°C. DBH is a specific marker for noradrenergic neurons in the brain.

140 The specificity of the antiserum has been described previously [24]. After rinsing in PBST three times for 5  
141 min, the sections were incubated in biotinylated goat anti-rabbit IgG (H+L) ((Product ID: BA-1000; Vector  
142 Laboratories, Burlingame, CA, USA) in PBST at a dilution of 1:1,000 for 2 h at RT. The sections were then  
143 washed with PBS three times for 5 min and incubated with avidin-biotin complex reagent at a dilution based  
144 on the manufacturer's recommendations (Vector Laboratories) for 30 min at RT. After washing in PBS three  
145 times for 5 min and rinsing with 0.1 M Tris-HCl buffer (pH 7.6), the sections were stained with 0.02% 3,3-  
146 diaminobenzidine substrate solution (Dojindo Molecular Technologies, Kumamoto, Japan) for 5 min. After  
147 washing in PBS three times for 5 min, the sections were mounted on 3-aminopropyltriethoxysilane-coated  
148 slides (Matsunami Glass, Osaka, Japan) and dried overnight at RT. The slide-mounted sections were then  
149 dehydrated through a graded ethanol series and coverslipped with Entellan mountant (Merck, Darmstadt,  
150 Germany). All sections were viewed under a bright field microscope and images of sections were taken with  
151 a Keyence BZ-X710 microscope (Keyence Corp., Osaka, Japan).

152

### 153 **2.5. *In situ* hybridization**

154 The cDNA fragments [ $\alpha$ 2A-adrenergic receptor (GenBank Acc. No. AB820133),  $\alpha$ 2C-adrenergic receptor  
155 (GenBank Acc. No. AB820134), and zenk (GenBank Acc. No. LC622525)] were isolated from the adult  
156 midbrain of two adult male Japanese quail in breeding condition by reverse transcription-polymerase chain  
157 reaction. The following primers were used: [5'-CAACGTCCTGGTCATCATTG-3' and 5'-  
158 ATGACGAAGACCCCAATCAC-3' for  $\alpha$ 2A-adrenergic receptor, 5'-CTCTGGTCATGCCTTTCTCC-3' and  
159 5'-TCCCCGGCAAATACCATAGAG-3' for  $\alpha$ 2C-adrenergic receptor; and 5'-  
160 AAAACCATGCCAGAAACCAG -3' and 5'- GGCAGCAACAGAGGAAGAAG-3' for zenk. Each cDNA  
161 fragment was inserted into the pCR II-T (Invitrogen, Carlsbad, CA, USA) or p-GEM-t easy vectors  
162 (Promega, Madison, WI, USA). The plasmids were digested with the XhoI, SpeI, or NcoI enzymes to release  
163 the fragment, and probes were synthesized using SP6 or T7 RNA polymerase (Roche Diagnostics, Rotkreuz,  
164 Switzerland) with a digoxigenin (DIG)-labeling mix (Roche Diagnostics). Sense probes corresponding to  
165 each antisense probe were also synthesized as controls.

166 Four adult male quail in breeding condition were killed by rapid decapitation for analyses of  $\alpha$ 2A-  
167 and  $\alpha$ 2C-adrenergic receptor mRNA expression. Six quail (vehicle-injected quail, n = 3; clonidine-injected  
168 quail, n = 3) were immediately decapitated (within 5 min after the end of the behavioral test) to quantify  
169 zenk mRNA expression in the ICo. Each brain was carefully removed from the skull and embedded in  
170 Tissue-Tek optimum cutting temperature compound (Sakura Finetek), frozen on dry ice and stored at  $-80^{\circ}\text{C}$   
171 until analyses. Frozen brains were cut into 20- $\mu\text{m}$  coronal sections on a cryostat (Leica Microsystems). Every  
172 sixth section through the midbrain from each animal was mounted on 3-aminopropyltriethoxysilane-coated  
173 slides (Matsunami Glass) and stored at  $-80^{\circ}\text{C}$  until use. The sections were post-fixed in 4%

174 paraformaldehyde for 10 min and washed in 0.1 M PBS (pH 7.4) three times for 5 min. The slides were then  
175 acetylated with 0.25% acetic anhydride in 0.1 M triethanolamine for 10 min and washed in PBS with 1%  
176 Triton X-100 (Sigma-Aldrich) for 30 min. The sections were then incubated at RT with hybridization buffer  
177 containing 50% formamide (Wako Pure Chemicals, Osaka, Japan), 5× saline sodium citrate, 1× Denhardt's  
178 solution (Sigma-Aldrich), 200 µg/mL yeast tRNA (Roche Diagnostics), and 500 µg/mL DNA (Roche  
179 Diagnostics). The sections were hybridized at 72°C overnight in a hybridization buffer with RNA probes.  
180 The sections were rinsed in 0.2× saline sodium citrate at 72°C for 2 h and then blocked for 2 h in a solution  
181 of 0.1 M Tris (pH 7.5, Pure Chemicals) and 0.15 M NaCl (Pure Chemicals) with 10% sheep serum. The  
182 slides were incubated overnight with a 1:5,000 dilution of alkaline phosphatase-conjugated anti-DIG  
183 antibody (Roche Diagnostics). After the slides had been washed in in a solution of 0.1 M Tris (pH 7.5) and  
184 0.15 M NaCl with 0.1% Polysorbate 20 (Pure Chemicals) three times for 5 min, alkaline phosphatase activity  
185 was detected by incubation with 375 mg/mL nitroblue tetrazolium chloride (Roche Diagnostics) and 188  
186 mg/mL 5-bromo-4-chloro-3-indolyl phosphate (Roche Diagnostics) in a solution of 0.1 M Tris (pH 9.5), 0.1  
187 M NaCl, and 50 mM MgCl<sub>2</sub> (Pure Chemicals) at RT overnight. This results in labeled cells expressing a  
188 purple-blue color. Brain sections incubated with control sense probes processed in the same way as detailed  
189 above showed no specific reactivity. Images of ICo sections were captured with a Keyence BZ-X710  
190 microscope or a LeicaMC170 HD camera attached to a Leica DM500 microscope (Leica Microsystems).

191

## 192 **2.6. Statistical analyses**

193 Statistical analyses were conducted with Prism 8.0 software (GraphPad Software, La Jolla, CA, USA) or  
194 IBM SPSS Statistics v24 (IBM Corp., Armonk, NY, USA). Data were analyzed by a one-way analysis of  
195 variance (ANOVA) followed by Tukey's multiple comparison test or a repeated two-way ANOVA followed  
196 by Bonferrini's test. *P* values < 0.05 were considered significant.

197

## 198 **3. Results**

### 199 **3.1. Effects of noradrenaline and clonidine on crow vocalizations**

200 ICV injection of noradrenaline had no effect on male crowing behavior at either dose during the 60-min test  
201 period compared to vehicle treated birds (Figs. 1 & 2). In contrast, 0.5 µg of clonidine inhibited crow  
202 vocalizations 20 min after injection, and 1 µg of clonidine had the same effect for 60 min (Fig. 3). Clonidine  
203 decreased the frequency of crowing in a dose dependent manner ( $F_{(5,12)} = 5.466$ ,  $P = 0.0075$  by one-way  
204 ANOVA,  $P = 0.0043$  vs. vehicle,  $P = 0.047$  vs. 100 ng of clonidine by Tukey's multiple comparison test;  
205 Fig. 2).



206 Measures of feeding behavior were analyzed via a two-way repeated measures ANOVA with group  
207 (clonidine/vehicle) and day (Day 1/Day 2) as factors and central administration of 1  $\mu$ g of clonidine  
208 increased feeding behavior compared to vehicle administration. (Fig. 4). There was a main effect in the group  
209 factor ( $F_{(1,5)} = 10.10$ ,  $P = 0.025$ ) and in the day factor ( $F_{(1,5)} = 13.00$ ,  $P = 0.015$ ). In the interaction analysis  
210 between group and day factors, a significant interaction was found ( $F_{(1,5)} = 12.76$ ,  $P = 0.016$ ). A  
211 simple main effect test using the Bonferroni method revealed significant differences between the vehicle -  
212 injected birds on Day 1 and the clonidine-injected birds on Day 2 (within subject;  $P = 0.005$ ) and between  
213 the vehicle and clonidine-injected on Day 2 (between subject;  $P = 0.019$ ).

214

### 215 **3.2. Zenk mRNA expression after ICV clonidine injection**

216 Zenk mRNA expression was detected in the dorsomedial ICo of all the ICV-vehicle injected quail (Fig. 5A)  
217 but 1  $\mu$ g ICV-clonidine completely abolished this expression (Fig. 5B). No signal above background was  
218 observed using the zenk sense control probes (Fig. 5C & D).

219

### 220 **3.3. Noradrenergic innervation of the dorsomedial ICo**

221 We have previously used DBH immunostaining as a noradrenergic marker and described antiserum specificity  
222 [24]. The same immunostaining method was applied this study. DBH-immunoreactive cell bodies were  
223 observed in the locus coeruleus (LoC; Fig. 6A), nucleus subcoeruleus ventralis (SCv; Fig. 6B), and lateral  
224 tegmental field (LT; Fig. 6C), as well the DBH-immunoreactive fibers in the dorsomedial ICo (Fig. 6D), which  
225 possessed many varicosities (Fig. 6E).

226

### 227 **3.4. Expression of $\alpha$ 2-adrenergic receptor mRNA in ICo neurons**

228 *In situ* hybridization identified  $\alpha$ 2-adrenergic receptor mRNA expression in the ICo of the Japanese quail.  
229 cDNAs from the midbrain were cloned for  $\alpha$ 2A- and  $\alpha$ 2C-, but not  $\alpha$ 2B-adrenergic receptor, and as templates  
230 to prepare *in situ* hybridization probes. Intense expression of  $\alpha$ 2A-adrenergic receptor mRNA was localized  
231 in the dorsomedial ICo (Fig. 7A). Signal for  $\alpha$ 2C-adrenergic receptor mRNA expression were found in the  
232 optic tectum, but not in the ICo (Fig. 7C). Controls, in which the sense RNA probes were substituted for the  
233 antisense RNA probes, showed no positive mRNA signal in any of the brain sections (Fig. 7B & D).

234

## 235 **4. Discussion**

236 Centrally administered noradrenaline decreases plasma luteinizing hormone concentrations in adult male  
237 quail in breeding condition [23], which in turn possibly reduces blood testosterone concentrations. Crowing  
238 in quail is androgen-dependent [25], and we expected to observe an inhibitory effect of noradrenaline on  
239 crowing *via* activation of the hypothalamus-pituitary-gonad axis as well as a direct effect on the  $\alpha$ 2-



240 adrenergic receptors expressing in the ICo but those were not observed. Our results demonstrate for the first  
241 time that ICV-administered clonidine, but not noradrenaline, powerfully suppressed crowing in male adult  
242 quail in a dose-dependent manner. This finding may be explained by the fact that clonidine diffuses into the  
243 ventricles and binds to  $\alpha 2$ -adrenergic receptors, more potently than noradrenaline.

244 Clonidine has sedative effects, which is mediated by activation of central  $\alpha 2$ -adrenergic receptors  
245 but central administration of clonidine does not reduce all behavioral activity. In the present study, ICV  
246 injection of clonidine stimulated feeding behavior of adult male quail and this effect was similar to previous  
247 studies conducted using broiler and layer-type chick [26, 27]. An  $\alpha 2$ -adrenergic receptor antagonist,  
248 yohimbine attenuated the clonidine induced food intake [27], indicating that  $\alpha 2$ -adrenergic receptors are  
249 related to the stimulation of feeding in chick. Since stimulation of food intake caused by neuropeptide Y and  
250 beta-endorphin was attenuated by co-injection with yohimbine, the receptors also likely mediate the  
251 orexigenic effects of neuropeptide Y- and beta-endorphin in layer-type chicks [27]. These suggest that NPY-  
252 or endorphin-producing neurons form neural circuits that control food intake with noradrenergic neurons  
253 acting on  $\alpha 2$ -adrenergic receptors in the Galliformes species.

254 Activation of neurohormone and neurotransmitter receptors initiate an intracellular signaling  
255 cascade that leads to changes in genes transcription. The IEGs are critical signaling intermediates within this  
256 cascade and modulate neuronal activities by controlling gene transcription, *via* the binding of their protein  
257 forms to regulatory sites on DNA [21, 28]. Noradrenaline has a documented role in the regulation of IEG  
258 expression as lesioning noradrenergic fibers with the noradrenergic neurotoxin N-(2-chloroethyl)-N-ethyl-2-  
259 bromobenzylamine results in changes in telencephalic and hypothalamic zenk expression in adult birds [29,  
260 30]. The present study demonstrated that zenk mRNA was expressed in the dorsomedial region of the ICo in  
261 vehicle-injected males after they emitted crows. In comparison, male crowing was abolished by ICV-  
262 administered clonidine and this resulted in reduced zenk mRNA expression in the dorsomedial ICo. The  
263 neuronal expression of zenk mRNA in male quail, which emitted high-frequency crows, and their reduction  
264 by clonidine, suggests a link between the zenk gene in ICo neurons and the regulation of crowing. The  
265 reduction of zenk mRNA expression by clonidine may reflect a direct inhibitory action of clonidine on the  
266 dorsomedial ICo neurons through  $\alpha 2$ -adrenergic receptors to cause complete loss of crowing.

267 To investigate whether noradrenaline directly controls the midbrain vocal nucleus of ICo, the  
268 noradrenaline neuronal marker DBH was immunohistologically stained in the male quail brain. DBH-  
269 immunoreactive cell bodies were localized in the LoC, SCv, and LT, and DBH-immunoreactive fibers, were  
270 localized in the dorsomedial part of the ICo of male quail. A tract-tracing study in pigeons [31] showed that  
271 the ICo receives projections from LoC and SCv neurons. Together these findings suggest that ICo

272 neurons receive noradrenergic innervation, mainly from the LoC and SCv. Only  $\alpha$ 2A-adrenergic receptor  
273 mRNA was expressed in the dorsomedial region of the ICo and  $\alpha$ 2C-adrenergic receptor mRNA was  
274 expressed in the optic tectum, which is part of the midbrain visual system. These histochemical results  
275 support a direct inhibitory effect of noradrenaline on ICo neurons through the  $\alpha$ 2A-adrenergic receptor.

276 Noradrenaline is thought to play an important role in the behavioral regulation of potential mate  
277 cues such as arousal, attention, and goal-directed approach responses [29, 32, 33]. Male quail crow  
278 frequently during the breeding season as crowing elicits phonotaxis in female quail [2] but crowing is  
279 suppressed in the presences of a female. When male quail view a female there is  
280 increased extracellular noradrenaline release in the brain [23]. Therefore, it may be hypothesized that the  
281 presence of the female rapidly increases extracellular noradrenaline release in the brain, which acts on ICo  
282 neurons *via* the  $\alpha$ 2A-adrenergic receptor to inhibit ICo neuronal activity and suppress crowing. However,  
283 further research is required to test this hypothesis.

## 284 **5. Conclusion**

285 Together these data suggest that the  $\alpha$ 2-adrenergic system in the midbrain vocal center suppresses courtship  
286 vocalizations in male quail as centrally administered clonidine suppressed male crowing in a dose-dependent  
287 manner and diminished zenk mRNA expression in the dorsomedial ICo. We conclude that noradrenaline is  
288 likely to be a major factor in the regulation of bird vocalizations as the ICo receives noradrenergic  
289 innervation and express  $\alpha$ 2A-adrenergic receptor mRNA.

290

291

## 292 **Funding**

293 The present study was supported by Grants-in-Aid for Scientific Research from the Japan Society for the  
294 Promotion of Science (KAKENHI, JP16K18585) and Ministry of Education, Culture, Sports, Science and  
295 Technology-Supported Program for the Private University Research Branding Project to Y. Tobari. S. L.  
296 Meddle acknowledges Roslin Institute Strategic grant funding from the Biotechnology and Biological  
297 Sciences Research Council (BBSRC), UK (BB/P013759/1) and a BBSRC Japan Partnering Award  
298 (BB/M027805/1).

299

## 300 **CRedit authorship contribution statement**

301 **Yasuko Tobari:** Conceptualization, Formal analysis, Validation, Writing-original draft, Visualization,  
302 Project administration, Funding acquisition. **Ami Masuzawa:** Formal analysis, Investigation, Visualization.  
303 Validation. **Norika Harada:** Investigation, Visualization. **Kenta Suzuki:** Formal analysis. **Simone L**

304 **Meddle:** Writing-original draft, Funding acquisition.

305

### 306 **Declaration of Competing Interest**

307 The authors declare no conflicts of interest.

308

### 309 **Acknowledgements:**

310 We thank Mr. Yukinori Ebihara and Ms. Chie Ohya for their technical assistance.

311

### 312 **References**

313 [1] R.E. Moreau, The British status of the quail and some problems of its biology. , Br. Birds 44  
314 (1951) 257-276.

315 [2] J.L. Goodson, E. Adkins-Regan, Playback of crows of male Japanese quail elicits female  
316 phonotaxis., Condor 99 (1997) 990-993.

317 [3] S. Deregnacourt, S. Saar, M. Gahr, Dynamics of crowing development in the domestic  
318 Japanese quail (*Coturnix coturnix japonica*), Proc Biol Sci 276(1665) (2009) 2153-62.  
319 10.1098/rspb.2009.0016.

320 [4] M. Domjan, S. Nash, Stimulus control of social behaviour in male Japanese quail, *Coturnix*  
321 *coturnix japonica*, Anim. Behav. 36 (1988) 1006-1015.

322 [5] S.L. Meddle, V.M. King, B.K. Follett, J.C. Wingfield, M. Ramenofsky, A. Foidart, J.  
323 Balthazart, Copulation activates Fos-like immunoreactivity in the male quail forebrain, Behav.  
324 Brain Res. 85(2) (1997) 143-59.

325 [6] T.D. Charlier, G.F. Ball, J. Balthazart, Sexual behavior activates the expression of the  
326 immediate early genes c-fos and Zenk (egr-1) in catecholaminergic neurons of male Japanese quail,  
327 Neuroscience 131(1) (2005) 13-30. 10.1016/j.neuroscience.2004.09.068.

328 [7] Y. Tobari, Y. Sato, K. Okanoya, Hormonal responses to a potential mate in male birds., Adv.  
329 Exp. Med. Biol. 1001 (2017) 137-149.

330 [8] J.M. Wild, D. Li, C. Eagleton, Projections of the dorsomedial nucleus of the intercollicular  
331 complex (DM) in relation to respiratory-vocal nuclei in the brainstem of pigeon (*Columba livia*) and  
332 zebra finch (*Taeniopygia guttata*), J. Comp. Neurol. 377(3) (1997) 392-413.

333 [9] Y. Yazaki, T. Matsushima, K. Aoki, Testosterone modulates stimulation-induced calling  
334 behavior in Japanese quails, J Comp Physiol A 184 (1997) 13-19.

335 [10] L.M. Potash, Vocalizations Elicited by Electrical Brain Stimulation in *Coturnix coturnix*  
336 *japonica*, Behaviour 36(3) (1970) 149-167.

337 [11] S.E. Armitage, T.J. Seller, Midbrain regions involved in call production of Japanese quail,

- 338 *Experientia* 37(8) (1981) 847-848. 10.1007/BF01985673.
- 339 [12] B. Shaw, Involvement of a midbrain vocal nucleus in the production of both the acoustic and  
340 postural components of crowing behavior in Japanese quail, *J Comp Physiol A* 186(7-8) (2000)  
341 747-757.
- 342 [13] T.J. Seller, Midbrain vocalization centres in birds *Trends Neurosci.* 4 (1981) 301-303.  
343 doi:10.1016/0166-2236(81)90094-1
- 344 [14] J. Cohen, M.-F. Cheng, The role of the midbrain in courtship behavior of the female ring dove  
345 (*Streptopelia risoria*): Evidence from radiofrequency lesion and hormone implant studies, *Brain*  
346 *Research* 207(2) (1981) 279-301. [https://doi.org/10.1016/0006-8993\(81\)90365-6](https://doi.org/10.1016/0006-8993(81)90365-6).
- 347 [15] G.F. Ball, A. Foidart, J. Balthazart, A dorsomedial subdivision within the nucleus  
348 intercollicularis identified in the Japanese quail (*Coturnix coturnix japonica*) by means of alpha 2-  
349 adrenergic receptor autoradiography and estrogen receptor immunohistochemistry, *Cell Tissue Res.*  
350 257(1) (1989) 123-8.
- 351 [16] G.F. Ball, B. Nock, B.S. McEwen, J. Balthazart, Distribution of  $\alpha_2$ -adrenergic receptors in the  
352 brain of the Japanese quail as determined by quantitative autoradiography: implications for the  
353 control of sexually dimorphic reproductive processes, *Brain Res.* 491(1) (1989) 68-79.
- 354 [17] J. Balthazart, G.F. Ball, B.S. McEwen, An autoradiographic study of alpha 1-adrenergic  
355 receptors in the brain of the Japanese quail (*Coturnix coturnix japonica*), *Cell and Tissue Research*  
356 258(3) (1989) 563-8.
- 357 [18] J. Balthazart, G.F. Ball, Effects of the noradrenergic neurotoxin DSP-4 on luteinizing  
358 hormone levels, catecholamine concentrations,  $\alpha_2$ -adrenergic receptor binding, and aromatase  
359 activity in the brain of the Japanese quail., *Brain Res.* 492(1-2) (1989) 163-75.
- 360 [19] John Rossi III, Tony L. Sahley, J. Panksepp, The role of brain norepinephrine in clonidine  
361 suppression of isolation-induced distress in the domestic chick., *Psychopharmacology* 79 (1983)  
362 338 - 342.
- 363 [20] S.R. Barclay, M.F. Cheng, Role of catecholamines in the courship behavior of male ring  
364 doves., *Pharmacol. Biochem. Behav.* 41(4) (1992) 739-747. 10.1016/0091-3057(92)90221-z.
- 365 [21] D.F. Clayton, The Genomic Action Potential, *Neurobiol. Learn. Mem.* 74(3) (2000) 185-216.  
366 <https://doi.org/10.1006/nlme.2000.3967>.
- 367 [22] J.D. Bayle, F. Ramade, J. Oliver, Stereotaxic topography of the brain of the quail (*Coturnix*  
368 *coturnix japonica*), *J Physiol (Paris)* 68(2) (1974) 219-41.
- 369 [23] Y. Tobar, Y.L. Son, T. Ubuka, Y. Hasegawa, K. Tsutsui, A new pathway mediating social  
370 effects on the endocrine system: female presence acting via norepinephrine release stimulates  
371 gonadotropin-inhibitory hormone in the paraventricular nucleus and suppresses luteinizing hormone

- 372 in quail, *J Neurosci.* 34(29) (2014) 9803-11. 10.1523/JNEUROSCI.3706-13.2014.
- 373 [24] Y. Tobari, N. Kansaku, K. Tsutsui, Noradrenergic modulation of gonadotrophin-inhibitory  
374 hormone gene expression in the brain of Japanese quail, *J. Neuroendocrinol.* 29(8) (2017)  
375 10.1111/jne.12503.
- 376 [25] L. Beani, C. Lupo, F. Dessi-Fulgheri, F. Brigant, G. Campanella, Effect of androgens on  
377 structure and rate of crowing in the Japanese quail (*Coturnix japonica*), *Behaviour* 137(4) (2000)  
378 417–435. <https://doi.org/10.1163/156853900502150>.
- 379 [26] T. Bungo, M. Shimojo, Y. Masuda, Y.H. Choi, D.M. Denbow, M. Furuse, Induction of food  
380 intake by a noradrenergic system using clonidine and fusaric acid in the neonatal chick, *Brain Res.*  
381 826(2) (1999) 313-6.
- 382 [27] T. Tachibana, K. Sugahara, H. Ueda, M.A. Cline, Role of adrenergic alpha-2-receptors on  
383 feeding behavior in layer-type chicks, *Gen Comp Endocrinol* 161(3) (2009) 407-11.  
384 10.1016/j.ygcen.2009.02.006.
- 385 [28] W. Tischmeyer, R. Grimm, Activation of immediate early genes and memory formation, *Cell.*  
386 *Mol. Life Sci.* 55 (1999) 564– 574.
- 387 [29] L.V. Riters, B.A. Pawlisch, Evidence that norepinephrine influences responses to male  
388 courtship song and activity within song control regions and the ventromedial nucleus of the  
389 hypothalamus in female European starlings, *Brain Res.* 1149 (2007) 127-40.  
390 10.1016/j.brainres.2007.02.059.
- 391 [30] T.A. Velho, K. Lu, S. Ribeiro, R. Pinaud, D. Vicario, C.V. Mello, Noradrenergic control of  
392 gene expression and long-term neuronal adaptation evoked by learned vocalizations in songbirds,  
393 *PLoS One* 7(5) (2012) e36276. 10.1371/journal.pone.0036276.
- 394 [31] C.A. Kitt, S.E. Brauth, Telencephalic projections from midbrain and isthmal cell groups in the  
395 pigeon. I. Locus coeruleus and subcoeruleus, *J. Comp. Neurol.* 247 (1986) 69-91.
- 396 [32] G. Aston-Jones, J. Rajkowski, J. Cohen, Locus coeruleus and regulation of behavioral  
397 flexibility and attention, *Prog. Brain Res.* 126 (2000) 165-82. 10.1016/s0079-6123(00)26013-5.
- 398 [33] C.W. Berridge, B.D. Waterhouse, The locus coeruleus–noradrenergic system: modulation of  
399 behavioral state and state-dependent cognitive processes, *Brain Res. Rev.* 42(1) (2003) 33-84.  
400 10.1016/s0165-0173(03)00143-7.
- 401
- 402
- 403
- 404

405 **Figures & Figure Legends**

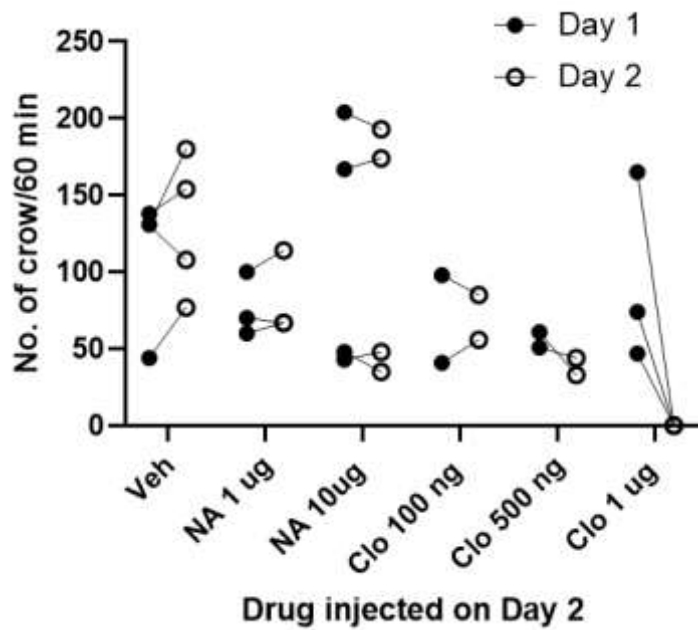

406

407 **Figure 1.**

408 Frequency of male crowing during a 60-min test period after intracerebroventricular (ICV) injection of

409 vehicle (Veh), noradrenaline (NA), or clonidine (Clo). Closed circles indicate the number of crow

410 vocalizations performed by quail receiving an ICV injection of vehicle alone on day 1. Open circles indicate

411 the number of crow vocalizations performed by quail receiving an ICV injection of vehicle, noradrenaline, or

412 clonidine on day 2. Values for the same individual are connected by lines.

413

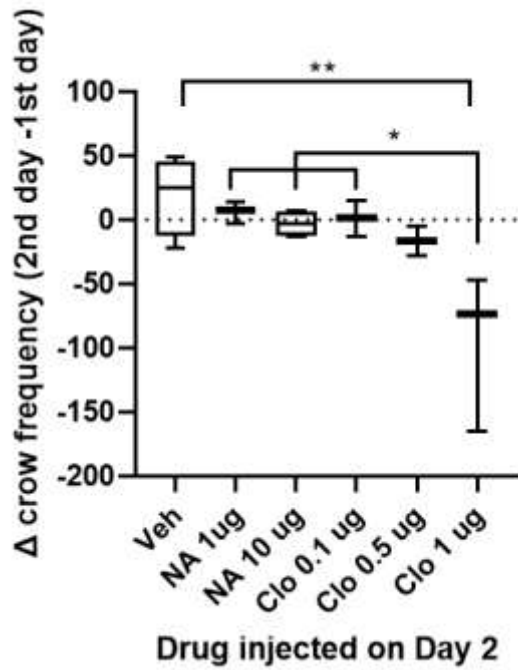

414

415 **Figure 2.**

416 Effects of clonidine on the frequency of crowing. Clonidine-injected quail decreased the number of crows on  
417 day 2 in a dose-dependent manner compared with the control on day 1. Box plots show the median (line) and  
418 75<sup>th</sup> and 25<sup>th</sup> percentiles (box) with the 95% confidence interval (error bars). NA, noradrenaline; Clo,  
419 clonidine; Veh, vehicle. \*  $P < 0.05$ , \*\*  $P < 0.01$ .

420



421

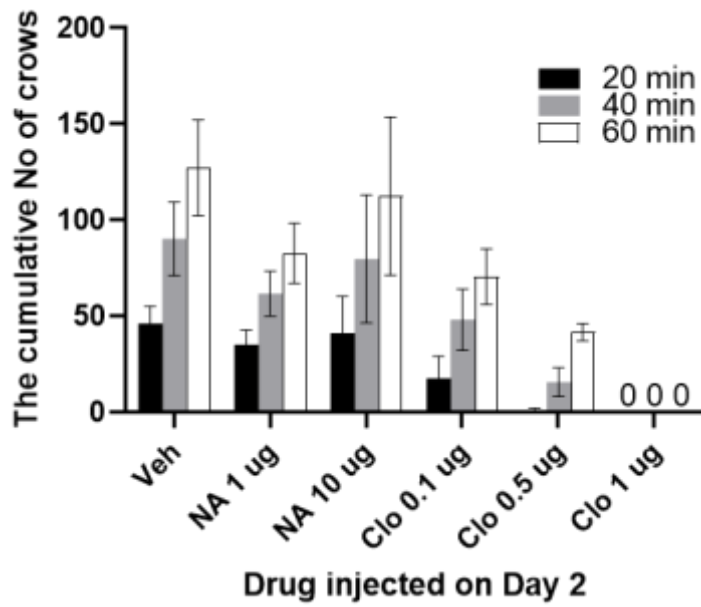

422

423 **Figure 3.**

424 Cumulative number of crows over a 1 h-period after an intracerebroventricular (ICV) injection of vehicle,  
425 noradrenaline or clonidine in male quail. Values are means  $\pm$  SEM. NA, noradrenaline; Clo, clonidine; Veh,  
426 vehicle.

427

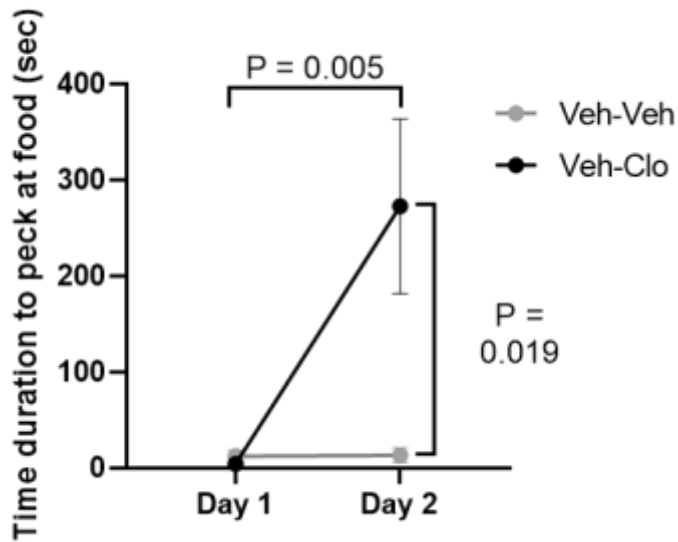

428

429 **Figure 4.**

430 Effect of clonidine on feeding behavior. Duration of pecking of food by quail that received an  
431 intracerebroventricular (ICV) injection of either vehicle (gray circles) or clonidine (black circles) on days 1  
432 and 2. Values are means  $\pm$  SEM and for the same group are connected by lines. NA, noradrenaline; Clo,  
433 clonidine.

434

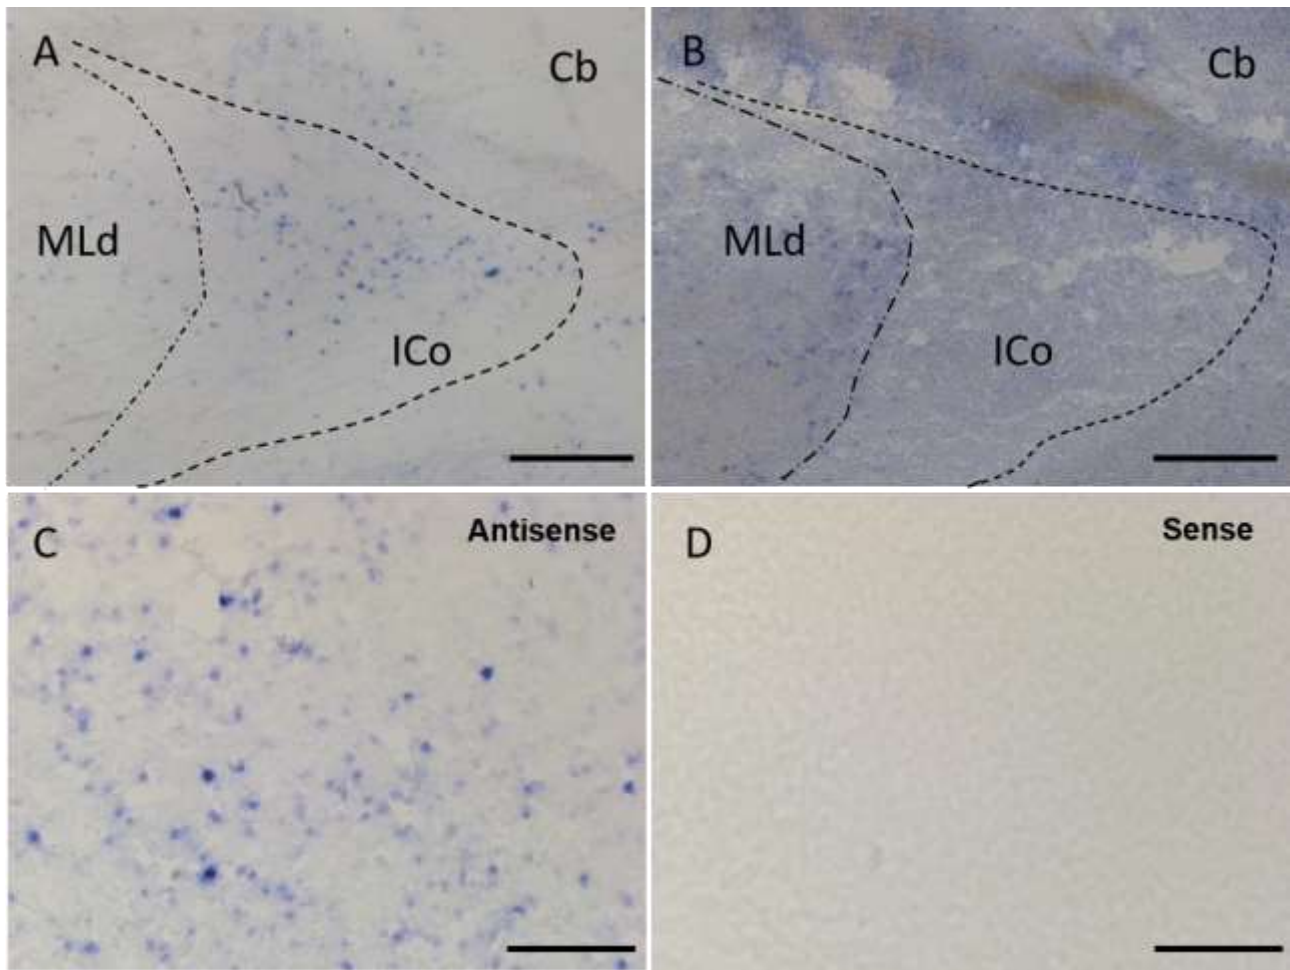

435

436

**Figure 5.**

437

Effect of clonidine on zenk mRNA expression in the midbrain vocal center. Representative

438

photomicrographs depicting the effect of vehicle (A) and clonidine (B) on zenk mRNA expression.

439

Hybridization with sense zenk probes served as a negative control for antisense probe specificity in vehicle

440

ICV injected birds (C, D). Scale bars = 500  $\mu\text{m}$  (A & B), 200  $\mu\text{m}$  (C & D). Cb, cerebellum; ICo, nucleus

441

intercollicularis; MLd, nucleus mesencephalicus lateralis pars dorsalis.

442

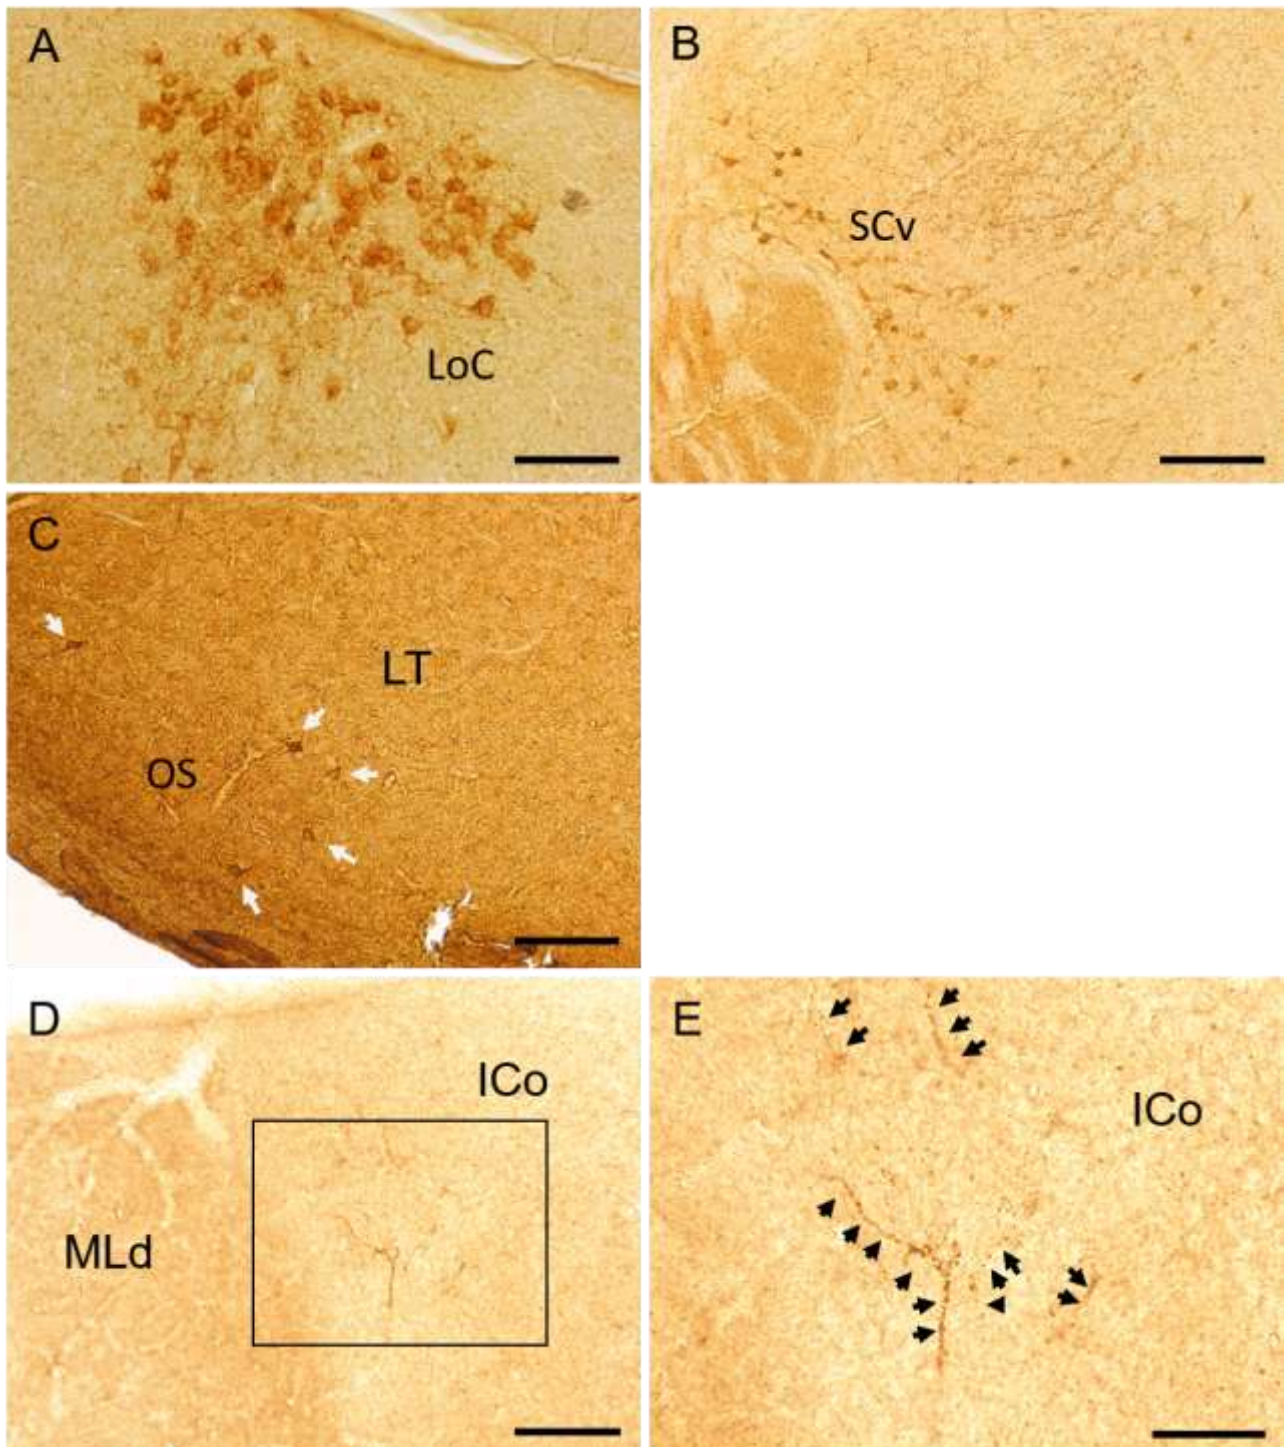

443

444

**Figure 6.**

445

Photomicrographs of dopamine beta hydroxylase (DBH)-immunoreactive (ir) cells and fibers.

446

DBH-ir cells in the locus coeruleus (LoC, A), nucleus subcoeruleus ventralis (SCv, B), and lateral tegmental field (LT, C). Low-power photomicrograph of the DBH-ir fibers in the nucleus intercollicularis (ICo, D).

447

Higher magnification photomicrograph of the DBH-ir fibers in the dorsomedial ICo (E). Scale bars = 100  $\mu$ m (A & D), 200  $\mu$ m (B & C) and 500  $\mu$ m (E).

448

449

450

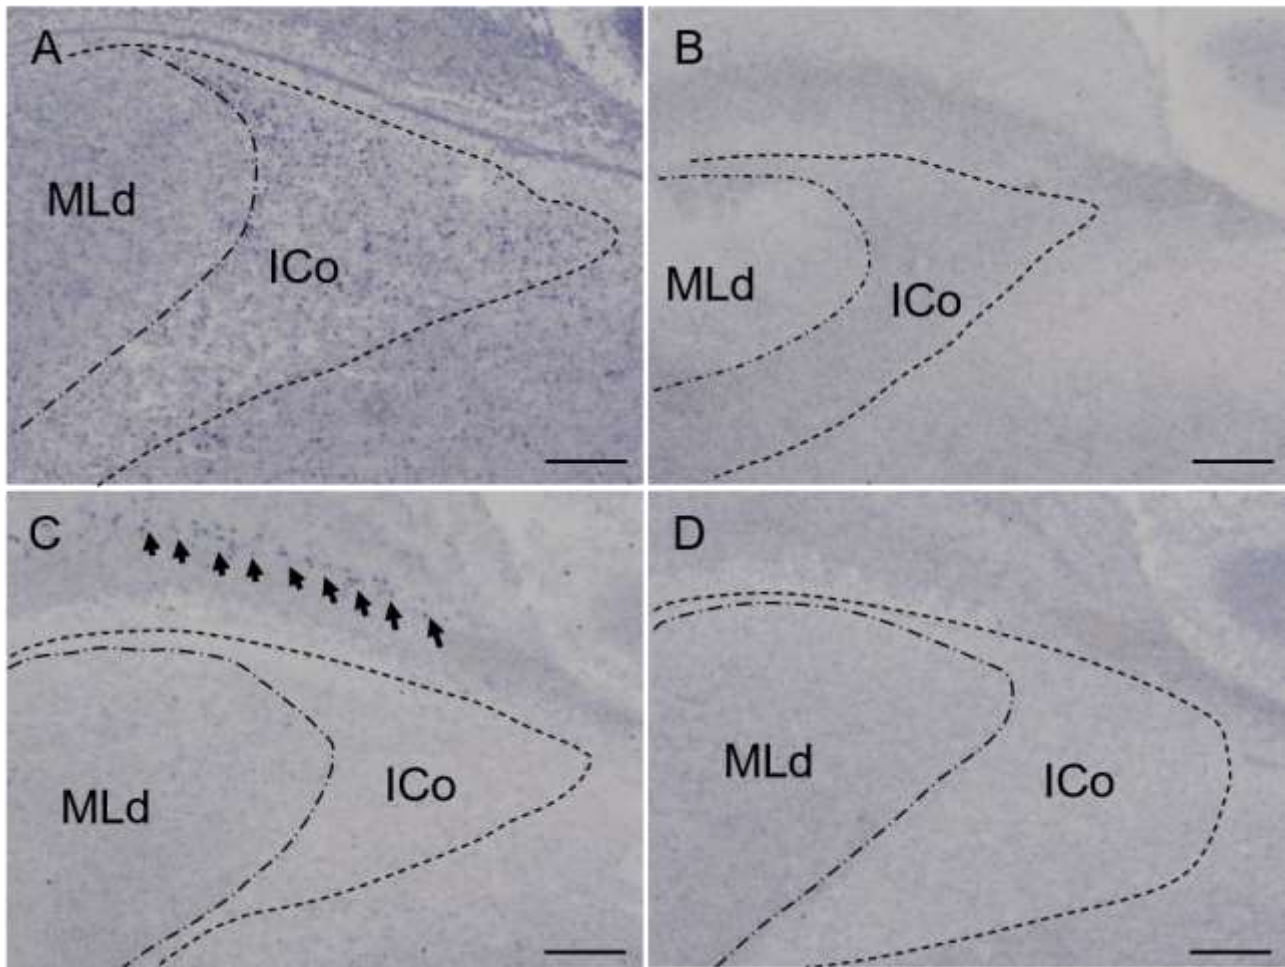

451

452

**Figure 7.**

453

$\alpha 2A$  and  $\alpha 2C$ -adrenergic receptor mRNA expression in the midbrain. Representative  $\alpha 2A$ - and  $\alpha 2C$ -

454

adrenergic receptor mRNA expression by *in situ* hybridization (A, C). Hybridization with sense  $\alpha 2A$ - and

455

$\alpha 2C$ -adrenergic receptor probes served as a negative control for antisense probe specificity (B, D). Scale bars

456

= 500  $\mu m$ .

457
